# Supplementary material
Source: MDPI journal article supplement (https://www.mdpi.com/2073-4441/15/15/2746)
Supplement: s1 [file s1 › Table S1.pdf]

**Table S1.** Analytical conditions of MALDI-TOF.

| <b>Factor</b>          | <b>Condition</b> | <b>Factor</b>           | <b>Condition</b> |
|------------------------|------------------|-------------------------|------------------|
| Mode of operation:     | Reflector        | Acquisition mass range: | 500–6000 Da      |
| Extraction mode:       | Delayed          | Number of laser shots:  | 800/spectrum     |
| Polarity:              | Positive         | Laser intensity:        | 35%              |
| Acquisition control:   | Manual           | Laser Rep Rate:         | 20.0 Hz          |
| Accelerating voltage:  | 20,000 V         | Calibration type:       | Cal Mix 1        |
| Grid voltage:          | 70.5%            | Calibration matrix:     | CHCA             |
| Guide wire 0:          | 0.0%             | Low mass gate:          | 0 m/z            |
| Extraction delay time: | 300 sec          | Instrument name:        | Ultraflex III    |
