# Supplementary material
Source: MDPI journal article supplement (https://www.mdpi.com/2073-4441/15/15/2746)
Supplement: s1 [file s1 › Table S2.pdf]

**Table S2.** Result of the correlation analysis between the ig-score and Kyte–Doolittle hydropathy index value.

|            |                       | <b>Ig-score</b> | <b>Hydropathy</b> |
|------------|-----------------------|-----------------|-------------------|
| Ig-score   | Pearson's correlation | 1               | -0.915**          |
|            | p value               |                 | 0.000             |
|            | N                     | 593             | 593               |
| Hydropathy | Pearson's correlation | -0.915**        | 1                 |
|            | p value               | 0.000           |                   |
|            | N                     | 593             | 593               |

\*\*p < 0.01.
