# Supplementary material
Source: MDPI journal article supplement (https://www.mdpi.com/2073-4441/15/15/2746)
Supplement: s1 [file s1 › Table S3.pdf]

**Table S3.** Chou–Fasman secondary structure prediction for calculating ig-score of *D. circinale*'s akinete-specific protein.

| No. |    | Secondary structure prediction                            |  |
|-----|----|-----------------------------------------------------------|--|
| 1   | SS | <b>0044444444444411111144441111222222221222220444444</b>  |  |
|     | CP | 72899999999986454326652134478899998863567899999999        |  |
| 51  | SS | <b>244444411122224442222222444222211112204444112224</b>   |  |
|     | CP | 998604599899999999999999997326898621010389999999851       |  |
| 101 | SS | <b>222222111122011222221121244211111111211111140222</b>   |  |
|     | CP | 66641025316776407855899999998468998888899989999988        |  |
| 151 | SS | <b>22222204114442222011444022244411111444221422221114</b> |  |
|     | CP | 75379999999999998578887599999999999999997601666666        |  |
| 201 | SS | <b>4422222222222211222442442442222222224442222212222</b>  |  |
|     | CP | 7678899999999999999999889999998587888899999998557899      |  |
| 251 | SS | <b>224244444244422211112222111122224444111141111222</b>   |  |
|     | CP | 9999999999999999864277089999999999999999642111268999      |  |
| 301 | SS | <b>111112222114222222222211111122222211441112222224</b>   |  |
|     | CP | 75187047899998668889987899313126887665103420147899        |  |
| 351 | SS | <b>0044441111111244444422222222222211111111414444222</b>  |  |
|     | CP | 999999864799989999999999999999999982199188987789999       |  |
| 401 | SS | <b>2242211144441111222222114112244444444444411444421</b>  |  |
|     | CP | 999999999999999999873858899999999999965799988999999       |  |
| 451 | SS | <b>11114140144111122221111214444444444422211122224411</b> |  |
|     | CP | 99999998615997511104552589999999975305788786888864        |  |
| 501 | SS | <b>122444111112221111444422222244422244411112222222</b>   |  |
|     | CP | 17714678888735777778998888322676466641453246789999        |  |
| 551 | SS | <b>422222211122222244222244442411222222224222111444</b>   |  |
|     | CP | 999999778997899999999999999999998236613445433368999       |  |

SS indicates secondary structure prediction (0: lack of secondary structure, 1: turn, 2: helix, 4: sheet), whereas CP indicates the confidence of the prediction [low (0) to high (9)].
